# Supplementary material for: Frailty Prevention Care Management Program (FPCMP) on Frailty and Health Function in Community-Dwelling Older Adults: A Quasi-Experimental Trial Protocol
Source: MDPI journal article supplement (doi:10.3390/healthcare11243188), 2023-12-17
Supplement: s1 [file s1]

Frailty Prevention Care Management Program.

| Intervention group            |      |                                                                   |                                                                   | Control group                              |
|-------------------------------|------|-------------------------------------------------------------------|-------------------------------------------------------------------|--------------------------------------------|
| 12 weeks intervention program | Week | Day1                                                              | Day2                                                              | Not receive any specific exercise training |
|                               | 1    | Total Resistance Exercises (TRX) program + nutritional assessment | Total Resistance Exercises (TRX) program + nutritional assessment |                                            |
|                               | 2    | Total Resistance Exercises (TRX) program + nutritional assessment | Total Resistance Exercises (TRX) program + nutrition education    |                                            |
|                               | 3    | Total Resistance Exercises (TRX) program + nutrition education    | Total Resistance Exercises (TRX) program + nutrition education    |                                            |
|                               | 4    | Total Resistance Exercises (TRX) program + nutrition education    | Total Resistance Exercises (TRX) program + nutrition education    |                                            |
|                               | 5    | Total Resistance Exercises (TRX) program + nutrition education    | Total Resistance Exercises (TRX) program + nutrition education    |                                            |
|                               | 6    | Total Resistance Exercises (TRX) program + nutrition education    | Total Resistance Exercises (TRX) program + nutrition education    |                                            |
|                               | 7    | Total Resistance Exercises (TRX) program + nutrition education    | Total Resistance Exercises (TRX) program + nutrition education    |                                            |
|                               | 8    | Total Resistance Exercises (TRX) program + nutrition education    | Total Resistance Exercises (TRX) program + nutrition education    |                                            |
|                               | 9    | Total Resistance Exercises (TRX) program + nutrition consultation | Total Resistance Exercises (TRX) program + nutrition consultation |                                            |
|                               | 10   | Total Resistance Exercises (TRX) program + nutrition consultation | Total Resistance Exercises (TRX) program + nutrition consultation |                                            |
|                               | 11   | Total Resistance Exercises (TRX) program + nutrition consultation | Total Resistance Exercises (TRX) program + nutrition consultation |                                            |
|                               | 12   | Total Resistance Exercises (TRX) program + nutrition consultation | Total Resistance Exercises (TRX) program + nutrition consultation |                                            |
